# Supplementary material for: Inverted translational control of eukaryotic gene expression by ribosome collisions
Source: PubMed Central journal article supplement (PMC6750593; doi:10.1371/journal.pbio.3000396), 2019-09-18

**A**

SEC model

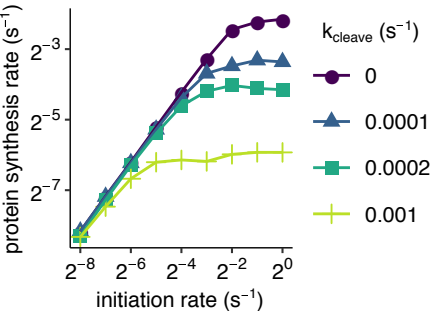**B**

CSEC model

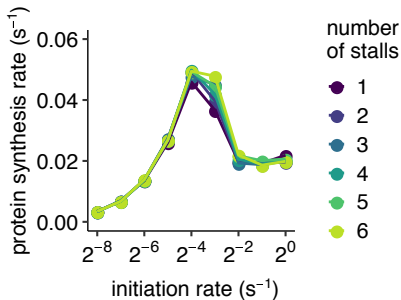

Supplement: pbio.3000396.s003.pdf [file pbio.3000396.s003.pdf]
