# Supplementary material for: Inverted translational control of eukaryotic gene expression by ribosome collisions
Source: PubMed Central journal article supplement (PMC6750593; doi:10.1371/journal.pbio.3000396), 2019-09-18

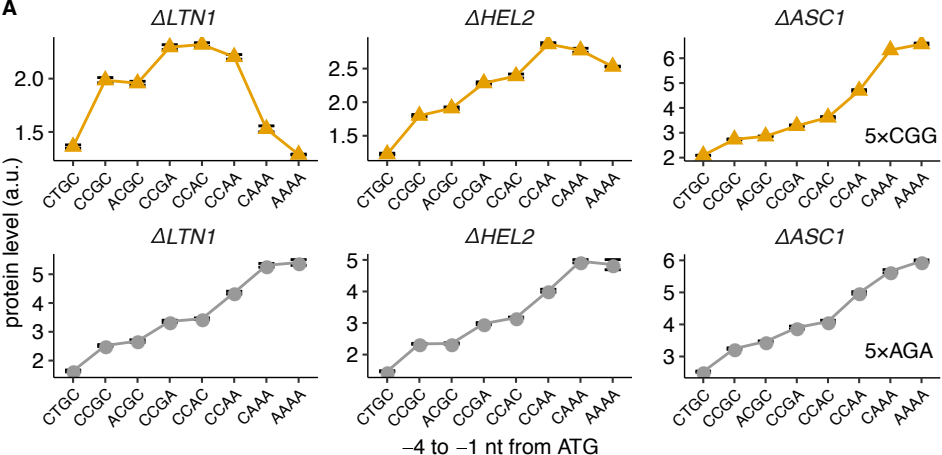

**B**

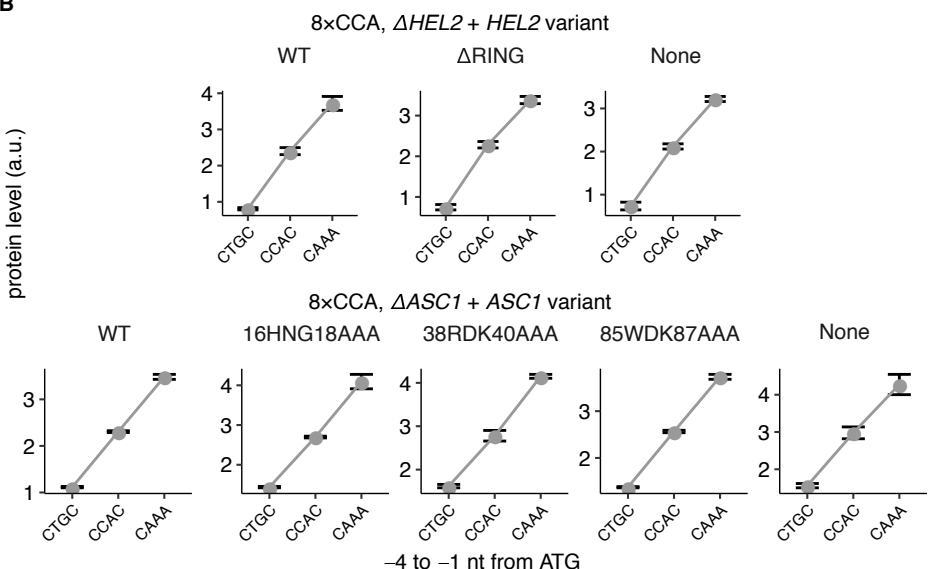

**C**

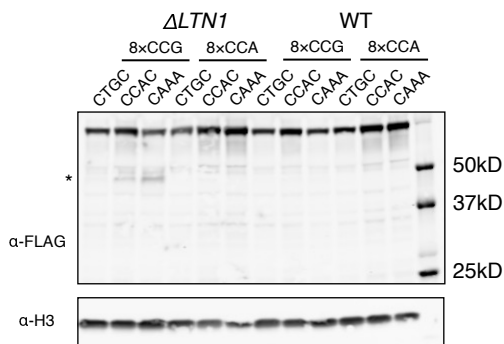

Supplement: pbio.3000396.s004.pdf [file pbio.3000396.s004.pdf]
