# Supplementary material for: Inverted translational control of eukaryotic gene expression by ribosome collisions
Source: PubMed Central journal article supplement (PMC6750593; doi:10.1371/journal.pbio.3000396), 2019-09-18
Supplement: pbio.3000396.s006.pdf [file pbio.3000396.s006.pdf]

**Table S1. List of plasmids used for this study**

| Plasmid  | Genotype                                | Figure | Source + Comment                                                                                    |
|----------|-----------------------------------------|--------|-----------------------------------------------------------------------------------------------------|
| p41894   | chrI-URA3-pGPD-ccdB-Cyc1t               | parent | Addgene 41894, single copy integration vector for ChrI safe harbor locus with URA3 selection marker |
| pHPSC16  | HO3-LEU2-pGPD-mKate2-Cyc1t              | parent | This work, single copy integration vector for HO locus with LEU2 selection marker                   |
| pSB2273  | HIS3-pGPD-osT-Adh1t                     | parent | Gift from Sue Biggins lab, single copy integration vector for HIS3 locus with HIS3 selection marker |
| pHPSC417 | p41894-CAAA-ATG-3xFLAG-PGK1-YFP         | 1,6    | This work, exp133                                                                                   |
| pHPSC418 | p41894-CCGC-ATG-3xFLAG-PGK1-YFP         | 1      | This work, exp133                                                                                   |
| pHPSC419 | p41894-CCAA-ATG-3xFLAG-PGK1-YFP         | 1      | This work, exp133                                                                                   |
| pHPSC420 | p41894-CCAC-ATG-3xFLAG-PGK1-YFP         | 1      | This work, exp133                                                                                   |
| pHPSC421 | p41894-CCGA-ATG-3xFLAG-PGK1-YFP         | 1      | This work, exp133                                                                                   |
| pHPSC422 | p41894-CTGC-ATG-3xFLAG-PGK1-YFP         | 1      | This work, exp133                                                                                   |
| pHPSC423 | p41894-AAAA-ATG-3xFLAG-PGK1-YFP         | 1      | This work, exp133                                                                                   |
| pHPSC424 | p41894-ACGC-ATG-3xFLAG-PGK1-YFP         | 1      | This work, exp133                                                                                   |
| pHPSC425 | p41894-CAAA-CTG-3xFLAG-PGK1-YFP         | 1      | This work, exp133                                                                                   |
| pHPSC354 | p41894-CAAA-ATG-3xFLAG-PGK1*-10xAAG-YFP | 1      | This work, exp98                                                                                    |
| pHPSC355 | p41894-CCGC-ATG-3xFLAG-PGK1*-10xAAG-YFP | 1      | This work, exp98                                                                                    |
| pHPSC356 | p41894-CCAA-ATG-3xFLAG-PGK1*-10xAAG-YFP | 1      | This work, exp98                                                                                    |
| pHPSC357 | p41894-CCAC-ATG-3xFLAG-PGK1*-10xAAG-YFP | 1      | This work, exp98                                                                                    |
| pHPSC358 | p41894-CCGA-ATG-3xFLAG-PGK1*-10xAAG-YFP | 1      | This work, exp98                                                                                    |
| pHPSC359 | p41894-CTGC-ATG-3xFLAG-PGK1*-10xAAG-YFP | 1      | This work, exp98                                                                                    |
| pHPSC360 | p41894-AAAA-ATG-3xFLAG-PGK1*-10xAAG-YFP | 1      | This work, exp98                                                                                    |
| pHPSC361 | p41894-ACGC-ATG-3xFLAG-PGK1*-10xAAG-YFP | 1      | This work, exp98                                                                                    |
| pHPSC363 | p41894-CAAA-ATG-3xFLAG-PGK1*-10xAGA-YFP | 1      | This work, exp98                                                                                    |
| pHPSC364 | p41894-CCGC-ATG-3xFLAG-PGK1*-10xAGA-YFP | 1      | This work, exp98                                                                                    |
| pHPSC365 | p41894-CCAA-ATG-3xFLAG-PGK1*-10xAGA-YFP | 1      | This work, exp98                                                                                    |
| pHPSC366 | p41894-CCAC-ATG-3xFLAG-PGK1*-10xAGA-YFP | 1      | This work, exp98                                                                                    |
| pHPSC367 | p41894-CCGA-ATG-3xFLAG-PGK1*-10xAGA-YFP | 1      | This work, exp98                                                                                    |
| pHPSC368 | p41894-CTGC-ATG-3xFLAG-PGK1*-10xAGA-YFP | 1      | This work, exp98                                                                                    |
| pHPSC369 | p41894-AAAA-ATG-3xFLAG-PGK1*-10xAGA-YFP | 1      | This work, exp98                                                                                    |
| pHPSC370 | p41894-ACGC-ATG-3xFLAG-PGK1*-10xAGA-YFP | 1      | This work, exp98                                                                                    |
| pHPSC314 | p41894-CAAA-ATG-3xFLAG-PGK1*-8xCCA-YFP  | 1      | This work, exp93                                                                                    |
| pHPSC315 | p41894-CCGC-ATG-3xFLAG-PGK1*-8xCCA-YFP  | 1      | This work, exp93                                                                                    |
| pHPSC316 | p41894-CCAA-ATG-3xFLAG-PGK1*-8xCCA-YFP  | 1      | This work, exp93                                                                                    |
| pHPSC317 | p41894-CCAC-ATG-3xFLAG-PGK1*-8xCCA-YFP  | 1      | This work, exp93                                                                                    |
| pHPSC318 | p41894-CCGA-ATG-3xFLAG-PGK1*-8xCCA-YFP  | 1      | This work, exp93                                                                                    |

Continued on next page

Continued from previous page

| Plasmid  | Genotype                                            | Figure | Source + Comment  |
|----------|-----------------------------------------------------|--------|-------------------|
| pHPSC319 | p41894-CTGC-ATG-3xFLAG-PGK1*-8xCCA-YFP              | 1      | This work, exp93  |
| pHPSC320 | p41894-AAAA-ATG-3xFLAG-PGK1*-8xCCA-YFP              | 1      | This work, exp93  |
| pHPSC321 | p41894-ACGC-ATG-3xFLAG-PGK1*-8xCCA-YFP              | 1      | This work, exp93  |
| pHPSC323 | p41894-CAAA-ATG-3xFLAG-PGK1*-8xCCG-YFP              | 1      | This work, exp93  |
| pHPSC324 | p41894-CCGC-ATG-3xFLAG-PGK1*-8xCCG-YFP              | 1      | This work, exp93  |
| pHPSC325 | p41894-CCAA-ATG-3xFLAG-PGK1*-8xCCG-YFP              | 1      | This work, exp93  |
| pHPSC326 | p41894-CCAC-ATG-3xFLAG-PGK1*-8xCCG-YFP              | 1      | This work, exp93  |
| pHPSC327 | p41894-CCGA-ATG-3xFLAG-PGK1*-8xCCG-YFP              | 1      | This work, exp93  |
| pHPSC328 | p41894-CTGC-ATG-3xFLAG-PGK1*-8xCCG-YFP              | 1      | This work, exp93  |
| pHPSC329 | p41894-AAAA-ATG-3xFLAG-PGK1*-8xCCG-YFP              | 1      | This work, exp93  |
| pHPSC330 | p41894-ACGC-ATG-3xFLAG-PGK1*-8xCCG-YFP              | 1      | This work, exp93  |
| pHPSC57  | p41894-CAAA-ATG-3xFLAG-PGK1*-5xAGA-YFP              | 1      | This work, exp60  |
| pHPSC126 | p41894-CCGC-ATG-3xFLAG-PGK1*-5xAGA-YFP              | 1      | This work, exp60  |
| pHPSC158 | p41894-CCAA-ATG-3xFLAG-PGK1*-5xAGA-YFP              | 1      | This work, exp60  |
| pHPSC159 | p41894-CCAC-ATG-3xFLAG-PGK1*-5xAGA-YFP              | 1      | This work, exp60  |
| pHPSC160 | p41894-CCGA-ATG-3xFLAG-PGK1*-5xAGA-YFP              | 1      | This work, exp60  |
| pHPSC161 | p41894-CTGC-ATG-3xFLAG-PGK1*-5xAGA-YFP              | 1      | This work, exp60  |
| pHPSC162 | p41894-AAAA-ATG-3xFLAG-PGK1*-5xAGA-YFP              | 1      | This work, exp60  |
| pHPSC163 | p41894-ACGC-ATG-3xFLAG-PGK1*-5xAGA-YFP              | 1      | This work, exp60  |
| pHPSC72  | p41894-CAAA-ATG-3xFLAG-PGK1*-5xCGG-YFP              | 1      | This work, exp60  |
| pHPSC131 | p41894-CCGC-ATG-3xFLAG-PGK1*-5xCGG-YFP              | 1      | This work, exp60  |
| pHPSC188 | p41894-CCAA-ATG-3xFLAG-PGK1*-5xCGG-YFP              | 1      | This work, exp60  |
| pHPSC193 | p41894-CCAC-ATG-3xFLAG-PGK1*-5xCGG-YFP              | 1      | This work, exp60  |
| pHPSC168 | p41894-CCGA-ATG-3xFLAG-PGK1*-5xCGG-YFP              | 1      | This work, exp60  |
| pHPSC198 | p41894-CTGC-ATG-3xFLAG-PGK1*-5xCGG-YFP              | 1      | This work, exp60  |
| pHPSC203 | p41894-AAAA-ATG-3xFLAG-PGK1*-5xCGG-YFP              | 1      | This work, exp60  |
| pHPSC208 | p41894-ACGC-ATG-3xFLAG-PGK1*-5xCGG-YFP              | 1      | This work, exp60  |
| pHPSC513 | pSB2273-HEL2                                        | 5      | This work, exp153 |
| pHPSC515 | pSB2273-HEL2-delring                                | 5      | This work, exp153 |
| pHPSC516 | pSB2273-ASC1                                        | 5      | This work, exp153 |
| pHPSC517 | pSB2273-ASC1-h16                                    | 5      | This work, exp153 |
| pHPSC518 | pSB2273-ASC1-r38                                    | 5      | This work, exp153 |
| pHPSC519 | pSB2273-ASC1-w85                                    | 5      | This work, exp153 |
| pHPSC512 | Barcoded plasmid pool (see plasmid cloning methods) | 2,5    | This work, exp152 |
| pHPSC758 | p41894-PGK1-MAP2stall-YFP                           | 6      | This work, exp176 |
| pHPSC759 | p41894-PGK1-PAR32stall-YFP                          | 6      | This work, exp176 |
| pHPSC760 | p41894-PGK1-HMO1stall-YFP                           | 6      | This work, exp176 |
| pHPSC761 | p41894-PGK1-RMP1stall-YFP                           | 6      | This work, exp176 |
| pHPSC762 | p41894-PGK1-TMA23stall-YFP                          | 6      | This work, exp176 |
| pHPSC763 | p41894-PGK1-JJJ1stall-YFP                           | 6      | This work, exp176 |
