# Supplementary material for: Inverted translational control of eukaryotic gene expression by ribosome collisions
Source: PubMed Central journal article supplement (PMC6750593; doi:10.1371/journal.pbio.3000396), 2019-09-18
Supplement: pbio.3000396.s007.pdf [file pbio.3000396.s007.pdf]

**Table S2. List of *S. cerevisiae* strains used in this study**

| Strain   | Genotype, integrated plasmid                                                 | Figure | Source + Comment  |
|----------|------------------------------------------------------------------------------|--------|-------------------|
| BY4741   | S288C, MATa HIS3 $\Delta$ 1 LEU2 $\Delta$ 0 MET15 $\Delta$ 0 URA3 $\Delta$ 0 | Parent | Thermo Fisher     |
| scHP15   | BY4741, pHPSC16                                                              | Parent | This work         |
| scAS12   | scHP15, LTN1::KAN                                                            | Parent | This work         |
| scAS17   | scHP15, DOM34::KAN                                                           | Parent | This work         |
| scHP498  | scHP15, ASC1::NAT                                                            | Parent | This work         |
| scHP520  | scHP15, HEL2::NAT                                                            | Parent | This work         |
| scHP1125 | scHP15, pHPSC512                                                             | 2      | This work, exp152 |
| scHP1126 | scAS12, pHPSC512                                                             | 5      | This work, exp152 |
| scHP1127 | scAS17, pHPSC512                                                             | 5      | This work, exp152 |
| scHP1128 | scHP498, pHPSC512                                                            | 5      | This work, exp152 |
| scHP1129 | scHP520, pHPSC512                                                            | 5      | This work, exp152 |
| scHP971  | scHP15, pHPSC417                                                             | 1      | This work, exp133 |
| scHP972  | scHP15, pHPSC418                                                             | 1      | This work, exp133 |
| scHP973  | scHP15, pHPSC419                                                             | 1      | This work, exp133 |
| scHP974  | scHP15, pHPSC420                                                             | 1      | This work, exp133 |
| scHP975  | scHP15, pHPSC421                                                             | 1      | This work, exp133 |
| scHP976  | scHP15, pHPSC422                                                             | 1      | This work, exp133 |
| scHP977  | scHP15, pHPSC423                                                             | 1      | This work, exp133 |
| scHP978  | scHP15, pHPSC424                                                             | 1      | This work, exp133 |
| scHP674  | scHP15, pHPSC354                                                             | 1      | This work, exp98  |
| scHP675  | scHP15, pHPSC355                                                             | 1      | This work, exp98  |
| scHP676  | scHP15, pHPSC356                                                             | 1      | This work, exp98  |
| scHP677  | scHP15, pHPSC357                                                             | 1      | This work, exp98  |
| scHP678  | scHP15, pHPSC358                                                             | 1      | This work, exp98  |
| scHP679  | scHP15, pHPSC359                                                             | 1      | This work, exp98  |
| scHP680  | scHP15, pHPSC360                                                             | 1      | This work, exp98  |
| scHP681  | scHP15, pHPSC361                                                             | 1      | This work, exp98  |
| scHP683  | scHP15, pHPSC363                                                             | 1      | This work, exp98  |
| scHP684  | scHP15, pHPSC364                                                             | 1      | This work, exp98  |
| scHP685  | scHP15, pHPSC365                                                             | 1      | This work, exp98  |
| scHP686  | scHP15, pHPSC366                                                             | 1      | This work, exp98  |
| scHP687  | scHP15, pHPSC367                                                             | 1      | This work, exp98  |
| scHP688  | scHP15, pHPSC368                                                             | 1      | This work, exp98  |
| scHP689  | scHP15, pHPSC369                                                             | 1      | This work, exp98  |
| scHP690  | scHP15, pHPSC370                                                             | 1      | This work, exp98  |
| scHP617  | scHP15, pHPSC314                                                             | 1      | This work, exp93  |
| scHP618  | scHP15, pHPSC315                                                             | 1      | This work, exp93  |
| scHP619  | scHP15, pHPSC316                                                             | 1      | This work, exp93  |
| scHP620  | scHP15, pHPSC317                                                             | 1      | This work, exp93  |
| scHP621  | scHP15, pHPSC318                                                             | 1      | This work, exp93  |
| scHP622  | scHP15, pHPSC319                                                             | 1      | This work, exp93  |
| scHP623  | scHP15, pHPSC320                                                             | 1      | This work, exp93  |
| scHP624  | scHP15, pHPSC321                                                             | 1      | This work, exp93  |
| scHP626  | scHP15, pHPSC323                                                             | 1      | This work, exp93  |
| scHP627  | scHP15, pHPSC324                                                             | 1      | This work, exp93  |

Continued on next page

Continued from previous page

| Strain  | Genotype, integrated plasmid | Figure | Source + Comment  |
|---------|------------------------------|--------|-------------------|
| scHP628 | scHP15, pHPSC325             | 1      | This work, exp93  |
| scHP629 | scHP15, pHPSC326             | 1      | This work, exp93  |
| scHP630 | scHP15, pHPSC327             | 1      | This work, exp93  |
| scHP631 | scHP15, pHPSC328             | 1      | This work, exp93  |
| scHP632 | scHP15, pHPSC329             | 1      | This work, exp93  |
| scHP633 | scHP15, pHPSC330             | 1      | This work, exp93  |
| scHP76  | scHP15, pHPSC57              | 1      | This work, exp60  |
| scHP310 | scHP15, pHPSC126             | 1      | This work, exp60  |
| scHP311 | scHP15, pHPSC158             | 1      | This work, exp60  |
| scHP312 | scHP15, pHPSC159             | 1      | This work, exp60  |
| scHP313 | scHP15, pHPSC160             | 1      | This work, exp60  |
| scHP314 | scHP15, pHPSC161             | 1      | This work, exp60  |
| scHP315 | scHP15, pHPSC162             | 1      | This work, exp60  |
| scHP316 | scHP15, pHPSC163             | 1      | This work, exp60  |
| scHP91  | scHP15, pHPSC72              | 1      | This work, exp60  |
| scHP271 | scHP15, pHPSC131             | 1      | This work, exp60  |
| scHP276 | scHP15, pHPSC188             | 1      | This work, exp60  |
| scHP281 | scHP15, pHPSC193             | 1      | This work, exp60  |
| scHP266 | scHP15, pHPSC168             | 1      | This work, exp60  |
| scHP286 | scHP15, pHPSC198             | 1      | This work, exp60  |
| scHP291 | scHP15, pHPSC203             | 1      | This work, exp60  |
| scHP296 | scHP15, pHPSC208             | 1      | This work, exp60  |
| scHP747 | scHP15, pHPSC314             | 5      | This work, exp114 |
| scHP748 | scHP15, pHPSC317             | 5      | This work, exp114 |
| scHP749 | scHP15, pHPSC319             | 5      | This work, exp114 |
| scHP750 | scHP15, pHPSC323             | 5      | This work, exp114 |
| scHP751 | scHP15, pHPSC326             | 5      | This work, exp114 |
| scHP752 | scHP15, pHPSC328             | 5      | This work, exp114 |
| scHP759 | scAS12, pHPSC314             | 5      | This work, exp114 |
| scHP760 | scAS12, pHPSC317             | 5      | This work, exp114 |
| scHP761 | scAS12, pHPSC319             | 5      | This work, exp114 |
| scHP762 | scAS12, pHPSC323             | 5      | This work, exp114 |
| scHP763 | scAS12, pHPSC326             | 5      | This work, exp114 |
| scHP764 | scAS12, pHPSC328             | 5      | This work, exp114 |
| scHP765 | scAS17, pHPSC314             | 5      | This work, exp114 |
| scHP766 | scAS17, pHPSC317             | 5      | This work, exp114 |
| scHP767 | scAS17, pHPSC319             | 5      | This work, exp114 |
| scHP768 | scAS17, pHPSC323             | 5      | This work, exp114 |
| scHP769 | scAS17, pHPSC326             | 5      | This work, exp114 |
| scHP770 | scAS17, pHPSC328             | 5      | This work, exp114 |
| scHP771 | scHP498, pHPSC314            | 5      | This work, exp114 |
| scHP772 | scHP498, pHPSC317            | 5      | This work, exp114 |
| scHP773 | scHP498, pHPSC319            | 5      | This work, exp114 |
| scHP774 | scHP498, pHPSC323            | 5      | This work, exp114 |
| scHP775 | scHP498, pHPSC326            | 5      | This work, exp114 |

Continued on next page

Continued from previous page

| Strain  | Genotype, integrated plasmid | Figure | Source + Comment  |
|---------|------------------------------|--------|-------------------|
| scHP776 | scHP498, pHPSC328            | 5      | This work, exp114 |
| scHP777 | scHP520, pHPSC314            | 5      | This work, exp114 |
| scHP778 | scHP520, pHPSC317            | 5      | This work, exp114 |
| scHP779 | scHP520, pHPSC319            | 5      | This work, exp114 |
| scHP780 | scHP520, pHPSC323            | 5      | This work, exp114 |
| scHP781 | scHP520, pHPSC326            | 5      | This work, exp114 |
| scHP782 | scHP520, pHPSC328            | 5      | This work, exp114 |
| scHP521 | scAS12, pHPSC57              | S4     | This work, exp70  |
| scHP531 | scAS12, pHPSC126             | S4     | This work, exp70  |
| scHP532 | scAS12, pHPSC158             | S4     | This work, exp70  |
| scHP533 | scAS12, pHPSC159             | S4     | This work, exp70  |
| scHP534 | scAS12, pHPSC160             | S4     | This work, exp70  |
| scHP535 | scAS12, pHPSC161             | S4     | This work, exp70  |
| scHP536 | scAS12, pHPSC162             | S4     | This work, exp70  |
| scHP537 | scAS12, pHPSC163             | S4     | This work, exp70  |
| scHP522 | scAS12, pHPSC72              | S4     | This work, exp70  |
| scHP523 | scAS12, pHPSC168             | S4     | This work, exp70  |
| scHP524 | scAS12, pHPSC131             | S4     | This work, exp70  |
| scHP525 | scAS12, pHPSC188             | S4     | This work, exp70  |
| scHP526 | scAS12, pHPSC193             | S4     | This work, exp70  |
| scHP527 | scAS12, pHPSC198             | S4     | This work, exp70  |
| scHP528 | scAS12, pHPSC203             | S4     | This work, exp70  |
| scHP529 | scAS12, pHPSC208             | S4     | This work, exp70  |
| scHP539 | scHP498, pHPSC57             | S4     | This work, exp70  |
| scHP549 | scHP498, pHPSC126            | S4     | This work, exp70  |
| scHP550 | scHP498, pHPSC158            | S4     | This work, exp70  |
| scHP551 | scHP498, pHPSC159            | S4     | This work, exp70  |
| scHP552 | scHP498, pHPSC160            | S4     | This work, exp70  |
| scHP553 | scHP498, pHPSC161            | S4     | This work, exp70  |
| scHP554 | scHP498, pHPSC162            | S4     | This work, exp70  |
| scHP555 | scHP498, pHPSC163            | S4     | This work, exp70  |
| scHP540 | scHP498, pHPSC72             | S4     | This work, exp70  |
| scHP541 | scHP498, pHPSC168            | S4     | This work, exp70  |
| scHP542 | scHP498, pHPSC131            | S4     | This work, exp70  |
| scHP543 | scHP498, pHPSC188            | S4     | This work, exp70  |
| scHP544 | scHP498, pHPSC193            | S4     | This work, exp70  |
| scHP545 | scHP498, pHPSC198            | S4     | This work, exp70  |
| scHP546 | scHP498, pHPSC203            | S4     | This work, exp70  |
| scHP547 | scHP498, pHPSC208            | S4     | This work, exp70  |
| scHP557 | scHP520, pHPSC57             | S4     | This work, exp70  |
| scHP567 | scHP520, pHPSC126            | S4     | This work, exp70  |
| scHP568 | scHP520, pHPSC158            | S4     | This work, exp70  |
| scHP569 | scHP520, pHPSC159            | S4     | This work, exp70  |
| scHP570 | scHP520, pHPSC160            | S4     | This work, exp70  |
| scHP571 | scHP520, pHPSC161            | S4     | This work, exp70  |
| scHP572 | scHP520, pHPSC162            | S4     | This work, exp70  |

Continued on next page

Continued from previous page

| Strain   | Genotype, integrated plasmid | Figure | Source + Comment  |
|----------|------------------------------|--------|-------------------|
| scHP573  | scHP520, pHPSC163            | S4     | This work, exp70  |
| scHP558  | scHP520, pHPSC72             | S4     | This work, exp70  |
| scHP559  | scHP520, pHPSC168            | S4     | This work, exp70  |
| scHP560  | scHP520, pHPSC131            | S4     | This work, exp70  |
| scHP561  | scHP520, pHPSC188            | S4     | This work, exp70  |
| scHP562  | scHP520, pHPSC193            | S4     | This work, exp70  |
| scHP563  | scHP520, pHPSC198            | S4     | This work, exp70  |
| scHP564  | scHP520, pHPSC203            | S4     | This work, exp70  |
| scHP565  | scHP520, pHPSC208            | S4     | This work, exp70  |
| scHP1130 | scHP520, pHPSC513            | 5      | This work, exp153 |
| scHP1132 | scHP520, pHPSC515            | 5      | This work, exp153 |
| scHP1133 | scHP498, pHPSC516            | 5      | This work, exp153 |
| scHP1134 | scHP498, pHPSC517            | 5      | This work, exp153 |
| scHP1135 | scHP498, pHPSC518            | 5      | This work, exp153 |
| scHP1136 | scHP498, pHPSC519            | 5      | This work, exp153 |
| scHP1137 | scHP1130, pHPSC314           | 5      | This work, exp153 |
| scHP1138 | scHP1130, pHPSC317           | 5      | This work, exp153 |
| scHP1139 | scHP1130, pHPSC319           | 5      | This work, exp153 |
| scHP1140 | scHP1130, pHPSC323           | 5      | This work, exp153 |
| scHP1141 | scHP1130, pHPSC326           | 5      | This work, exp153 |
| scHP1142 | scHP1130, pHPSC328           | 5      | This work, exp153 |
| scHP1143 | scHP1131, pHPSC314           | 5      | This work, exp153 |
| scHP1144 | scHP1131, pHPSC317           | 5      | This work, exp153 |
| scHP1145 | scHP1131, pHPSC319           | 5      | This work, exp153 |
| scHP1146 | scHP1131, pHPSC323           | 5      | This work, exp153 |
| scHP1147 | scHP1131, pHPSC326           | 5      | This work, exp153 |
| scHP1148 | scHP1131, pHPSC328           | 5      | This work, exp153 |
| scHP1149 | scHP1132, pHPSC314           | 5      | This work, exp153 |
| scHP1150 | scHP1132, pHPSC317           | 5      | This work, exp153 |
| scHP1151 | scHP1132, pHPSC319           | 5      | This work, exp153 |
| scHP1152 | scHP1132, pHPSC323           | 5      | This work, exp153 |
| scHP1153 | scHP1132, pHPSC326           | 5      | This work, exp153 |
| scHP1154 | scHP1132, pHPSC328           | 5      | This work, exp153 |
| scHP1155 | scHP1133, pHPSC314           | 5      | This work, exp153 |
| scHP1156 | scHP1133, pHPSC317           | 5      | This work, exp153 |
| scHP1157 | scHP1133, pHPSC319           | 5      | This work, exp153 |
| scHP1158 | scHP1133, pHPSC323           | 5      | This work, exp153 |
| scHP1159 | scHP1133, pHPSC326           | 5      | This work, exp153 |
| scHP1160 | scHP1133, pHPSC328           | 5      | This work, exp153 |
| scHP1161 | scHP1134, pHPSC314           | 5      | This work, exp153 |
| scHP1162 | scHP1134, pHPSC317           | 5      | This work, exp153 |
| scHP1163 | scHP1134, pHPSC319           | 5      | This work, exp153 |
| scHP1164 | scHP1134, pHPSC323           | 5      | This work, exp153 |
| scHP1165 | scHP1134, pHPSC326           | 5      | This work, exp153 |

Continued on next page

Continued from previous page

| <b>Strain</b> | <b>Genotype, integrated plasmid</b> | <b>Figure</b> | <b>Source + Comment</b> |
|---------------|-------------------------------------|---------------|-------------------------|
| scHP1166      | scHP1134, pHPSC328                  | 5             | This work, exp153       |
| scHP1167      | scHP1135, pHPSC314                  | 5             | This work, exp153       |
| scHP1168      | scHP1135, pHPSC317                  | 5             | This work, exp153       |
| scHP1169      | scHP1135, pHPSC319                  | 5             | This work, exp153       |
| scHP1170      | scHP1135, pHPSC323                  | 5             | This work, exp153       |
| scHP1171      | scHP1135, pHPSC326                  | 5             | This work, exp153       |
| scHP1172      | scHP1135, pHPSC328                  | 5             | This work, exp153       |
| scHP1173      | scHP1136, pHPSC314                  | 5             | This work, exp153       |
| scHP1174      | scHP1136, pHPSC317                  | 5             | This work, exp153       |
| scHP1175      | scHP1136, pHPSC319                  | 5             | This work, exp153       |
| scHP1176      | scHP1136, pHPSC323                  | 5             | This work, exp153       |
| scHP1177      | scHP1136, pHPSC326                  | 5             | This work, exp153       |
| scHP1178      | scHP1136, pHPSC328                  | 5             | This work, exp153       |
| scHP1490      | scHP15, pHPSC758                    | 6             | This work, exp176       |
| scHP1492      | scHP15, pHPSC759                    | 6             | This work, exp176       |
| scHP1493      | scHP15, pHPSC760                    | 6             | This work, exp176       |
| scHP1494      | scHP15, pHPSC761                    | 6             | This work, exp176       |
| scHP1495      | scHP15, pHPSC762                    | 6             | This work, exp176       |
| scHP1496      | scHP15, pHPSC763                    | 6             | This work, exp176       |
| scHP1497      | scHP15, pHPSC417                    | 6             | This work, exp176       |
| scHP1498      | scHP498, pHPSC758                   | 6             | This work, exp176       |
| scHP1500      | scHP498, pHPSC759                   | 6             | This work, exp176       |
| scHP1501      | scHP498, pHPSC760                   | 6             | This work, exp176       |
| scHP1502      | scHP498, pHPSC761                   | 6             | This work, exp176       |
| scHP1503      | scHP498, pHPSC762                   | 6             | This work, exp176       |
| scHP1504      | scHP498, pHPSC763                   | 6             | This work, exp176       |
| scHP1505      | scHP498, pHPSC417                   | 6             | This work, exp176       |
